# Supplementary material for: Evaluation of the Burden of Musculoskeletal Disorders in Korean Workers Using the Job-Exposure Matrix
Source: Preprints.org preprint supplement (doi:10.20944/preprints202408.1928.v1), 2024-08-27
Supplement: Supplementary file 1 [file supplementary]

**Appendix A.**

The appendix below shows the intensity of exposure to musculoskeletal risk factors by occupation and area according to the order of the 7th KSCO Korean job title.

| **NO** | **KSCO Job categories** | **UE, Neck** | **Back** | **LE** | **NO** | **KSCO Job categories** | **UE, Neck** | **Back** | **LE** |
| --- | --- | --- | --- | --- | --- | --- | --- | --- | --- |
| 1 | Domestic Chores and Infant Rearing Helpers | medium | low | medium | 77 | Fire and Emergency Management Engineers and Safety Professionals | low | low | medium |
| 2 | Nurses | medium | medium | high | 78 | Sports and Recreation Related Professionals | low | low | medium |
| 3 | Appraisers, Technical Sales Representatives, Brokers and Related Workers | low | low | low | 79 | Visual and Performing Artists | medium | low | medium |
| 4 | Building Concierges and Ticket Examiners | low | low | medium | 80 | Culinary Arts Related Professionals | low | medium | high |
| 5 | Construction Related Technical Workers | high | high | high | 81 | Food and Beverage Service Workers | medium | medium | high |
| 6 | Construction and Mining Laborers | high | high | high | 82 | Food Processing Related Machine Operators | high | high | high |
| 7 | Construction and Mining Machines Operators | high | medium | low | 83 | Pharmacists and Oriental Pharmacists | low | low | high |
| 8 | Construction, Electricity and Production Related Managers | medium | low | medium | 84 | Fishery Related Workers | high | high | high |
| 9 | Construction Structure Related Technical Workers | high | high | high | 85 | Leisure Services Workers | low | low | medium |
| 10 | Construction Finishing Related Technical Workers | high | high | high | 86 | Travel Agent, Information and Reception Clerks | low | low | low |
| 11 | Architectural Practicians, Construction Engineers and Technicians | medium | low | low | 87 | Research, Education and Legal Services Related Managers | low | low | low |
| 12 | Business Administration and Office Clerks | low | low | low | 88 | Drama, Film and Moving Image Professionals | low | low | medium |
| 13 | Police, Fire Fighting and Prison Related Workers | low | low | medium | 89 | Dietitians | low | low | medium |
| 14 | Guards and Security Related Workers | low | low | high | 90 | Sales Representatives | low | low | medium |
| 15 | Gauge Reading, Money Collecting and Parking Control Related Workers | low | medium | high | 91 | Welders | high | high | high |
| 16 | Customer Service and Other Office Clerks | low | low | low | 92 | Transport Services Workers | medium | low | high |
| 17 | Customer Service Managers | low | low | medium | 93 | Transport Equipment Mechanics | high | medium | high |
| 18 | Craftsmen and Metalsmiths | high | low | medium | 94 | Transportation Vehicle and Machine Related Assemblers | high | medium | high |
| 19 | Metal Work Machinery Operators | high | high | high | 95 | Horticultural and Landscape Workers | high | high | high |
| 20 | Metal and Material Engineers and Technicians | low | low | medium | 96 | Kindergarten Teachers | medium | low | high |
| 21 | Metal Machinery Parts Assemblers | high | medium | high | 97 | Beverage Product Related Machine Operators | medium | low | high |
| 22 | Finance and Insurance Professionals | low | low | low | 98 | Food Preparation Related Elementary Workers | high | medium | high |
| 23 | Finance Clerks | low | low | low | 99 | Medical Diagnosis and treatment Professional | medium | low | medium |
| 24 | Die and Mold Makers, Metal Casting Workers and Forge Hammersmiths | high | high | high | 100 | Garment Related Workers | high | low | low |
| 26 | Mechanical and Robot Engineers and Technicians | low | low | low | 101 | Legislators, Senior Government Officials and Senior Officials of Public Organization | low | low | low |
| 26 | Machinery Equipment Fitters and Mechanics | high | medium | high | 102 | Liberal Arts and Social Science Professionals | low | low | low |
| 27 | Senior Corporate Officers | low | low | low | 103 | HR & Business Administrations Professional | low | low | low |
| 28 | Other Construction, Electricity and Production Related Managers | low | low | low | 104 | Printing and Photo Development Related Machine Operators | high | medium | high |
| 29 | Other Engineering Professionals and Related Workers | medium | low | low | 105 | Forestry Related Workers | high | high | high |
| 30 | Other Educational Professionals | low | low | low | 106 | Automated Assembly Line Operators and Industrial Robot Operators | high | medium | high |
| 31 | Other Machine Operators | high | medium | high | 107 | Automobile Drivers | high | medkum | low |
| 32 | Other Technical Workers | high | medium | high | 108 | Automobile Mechanics | high | high | high |
| 33 | Other Caregiving, Health and Personal Service Workers | medium | medium | low | 109 | Writers, Journalists, and Related Professionals | low | low | low |
| 34 | Other Service Related Elementary Workers | medium | low | high | 110 | Crop Growers | high | high | high |
| 35 | Other Food Processing Related Machine Operators | high | medium | high | 111 | Recycling Machine and Incinerator Operators | medium | low | high |
| 36 | Other Professional Services Managers | low | low | low | 112 | Electrical and Electronic Equipment Operators | medium | low | medium |
| 37 | Other Sales and Customer Service Managers | low | low | low | 113 | Electrical, Electronic Parts and Products Production Equipment Operators | high | low | medium |
| 38 | Cooling and Heating Related Equipment Operators | medium | low | medium | 114 | Electrical, Electronic Parts and Products Assemblers | high | low | medium |
| 39 | Agriculture, Forestry and Fishery Related Elementary Workers | high | high | medium | 115 | Electrical, Electronic Engineers and Technicians | low | low | low |
| 40 | College Professors and Instructors | low | low | high | 116 | Electric and Electronic Machine Fitters and Repairers | medium | medium | medium |
| 41 | Data and Network Specialists | medium | low | low | 117 | Electricians | high | medium | high |
| 42 | Painting and Coating Machine Operators | high | medium | high | 118 | Information System Developers and Web Masters | low | low | low |
| 43 | Caregiving and Health Service Workers | medium | medium | medium | 119 | Information and Communications Related Managers | low | low | low |
| 44 | Designers | medium | low | low | 120 | Information and Communications Technology Equipment Fitters and Repairers | high | medium | high |
| 45 | Marketing, Advertising and Public Relations Managers | low | low | low | 121 | Pipe and Sheet Metal Makers | high | high | high |
| 46 | Store Sales Workers | medium | medium | high | 122 | Production Related Elementary Workers | high | medium | medium |
| 47 | Wood and Paper Related Machine Operators | high | high | high | 123 | Cooks | high | medium | high |
| 48 | Wood and Furniture, Musical Instrument and Signboard Related Trade Occupations | high | high | high | 124 | Religious Activities Related Workers | low | low | medium |
| 49 | Liberal Arts, Technical and Arts Instructors | low | low | medium | 125 | Metal Casting and Metal Processing Related Operators | high | high | high |
| 50 | Cultural Art Planners and Agents | low | low | medium | 126 | Textile and Shoe Related Machine Operators and Assemblers | high | medium | medium |
| 51 | Broadcasting, Publishing and Video Related Managers | low | low | low | 127 | Mining and Civil Engineering Related Technical Workers | high | high | high |
| 52 | Freight-handling Equipment Operators | high | high | medium | 128 | Locomotive and Electric Train Drivers | high | low | low |
| 53 | Hairdressing Related Service Workers | high | low | high | 129 | Freight Train Related Workers | medium | high | medium |
| 54 | Power Generation and Distribution Equipment Operators | medium | low | medium | 130 | Cleaners and Sanitation Workers | high | medium | high |
| 55 | Door to Door and Street Sales Related Workers | low | medium | low | 131 | Livestock and Stockbreeding Related Workers | medium | high | high |
| 56 | Broadcasting and Telecommunications Equipment Related Fitters and Repairers | high | high | high | 132 | Therapists, Pathologists and Medical Technologists | high | medium | medium |
| 57 | Plumbers | high | high | high | 133 | Computer System and Application Software Developers | low | low | low |
| 58 | Deliverers | medium | high | high | 134 | Computer Hardware and Telecommunication Engineering Professionals | low | low | low |
| 59 | Legal and Inspection Clerks | low | low | low | 135 | Statistical Service Related Clerks | low | low | low |
| 60 | Legal Professionals | low | low | low | 136 | Mobile Telecommunication Related Sales Workers and Telesales Workers | low | low | medium |
| 61 | Health and Social Welfare Service Related Managers | low | low | low | 137 | Sales Related Elementary Workers | medium | medium | high |
| 62 | Health and Medical Service Related Workers | medium | medium | high | 138 | Sales and Transport Managers | low | low | low |
| 63 | Insurance and Finance Managers | low | low | low | 139 | Loading and Lifting Elementary Workers | high | high | high |
| 64 | Non-metal Products Production Machine Operator | high | medium | high | 140 | School Teachers | low | low | high |
| 65 | Secretaries and Administrative Assistants | low | low | low | 141 | Curators, Librarians and Archivists | low | low | low |
| 66 | Social Welfare Service Related Workers | low | low | medium | 142 | Aircraft Pilots, Ship Engineers, Controllers | medium | low | low |
| 67 | Product Planning, Public Relations and Survey Professionals | low | low | low | 143 | Public and Business Administration Managers | low | low | low |
| 68 | Rental Sales Workers | low | low | medium | 144 | Administrative Clerks | medium | low | low |
| 69 | Water Treatment Plant Operators | medium | low | medium | 145 | Administration Professionals | low | low | low |
| 70 | Biological and Natural Science Related Technicians | medium | low | medium | 146 | Wedding Ceremony and Funeral Service Workers | low | low | medium |
| 71 | Biological and Natural Science Related Professionals | low | low | low | 147 | Chemical, Rubber and Plastic Production Machine Operators | high | medium | high |
| 72 | Petroleum and Chemical Material Processing Machine Operators | high | medium | high | 148 | Chemical Engineers and Technicians | low | low | medium |
| 73 | Ship Workers and Related Workers | high | high | high | 149 | Environmental, Cleaning, and Protective Service Related Manager | low | low | low |
| 74 | Textile and Leather Related Workers | high | medium | low | 150 | Environment, Gas and Energy Engineers and Technicians | medium | low | medium |
| 75 | Textile Production and Processing Machine Operators | high | medium | high | 151 | Accounting and Book-keeping Clerks | low | low | low |
| 76 | Laundry Related Machine Operators | high | medium | high |  |  |  |  |  |

UE : upper extremity

LE : lower extremity
